# Supplementary material for: Oncogenic Role of an Epigenetic Reader of m6A RNA Modification: YTHDF1 in Merkel Cell Carcinoma
Source: MDPI journal article supplement (doi:10.3390/cancers12010202), 2020-01-14

# Oncogenic Role of an Epigenetic Reader of m<sup>6</sup>A RNA Modification, YTHDF1 in Merkel Cell Carcinoma

Elias Orouji, Wiebke K. Peitsch, Azadeh Orouji, Roland Houben and Jochen Utikal

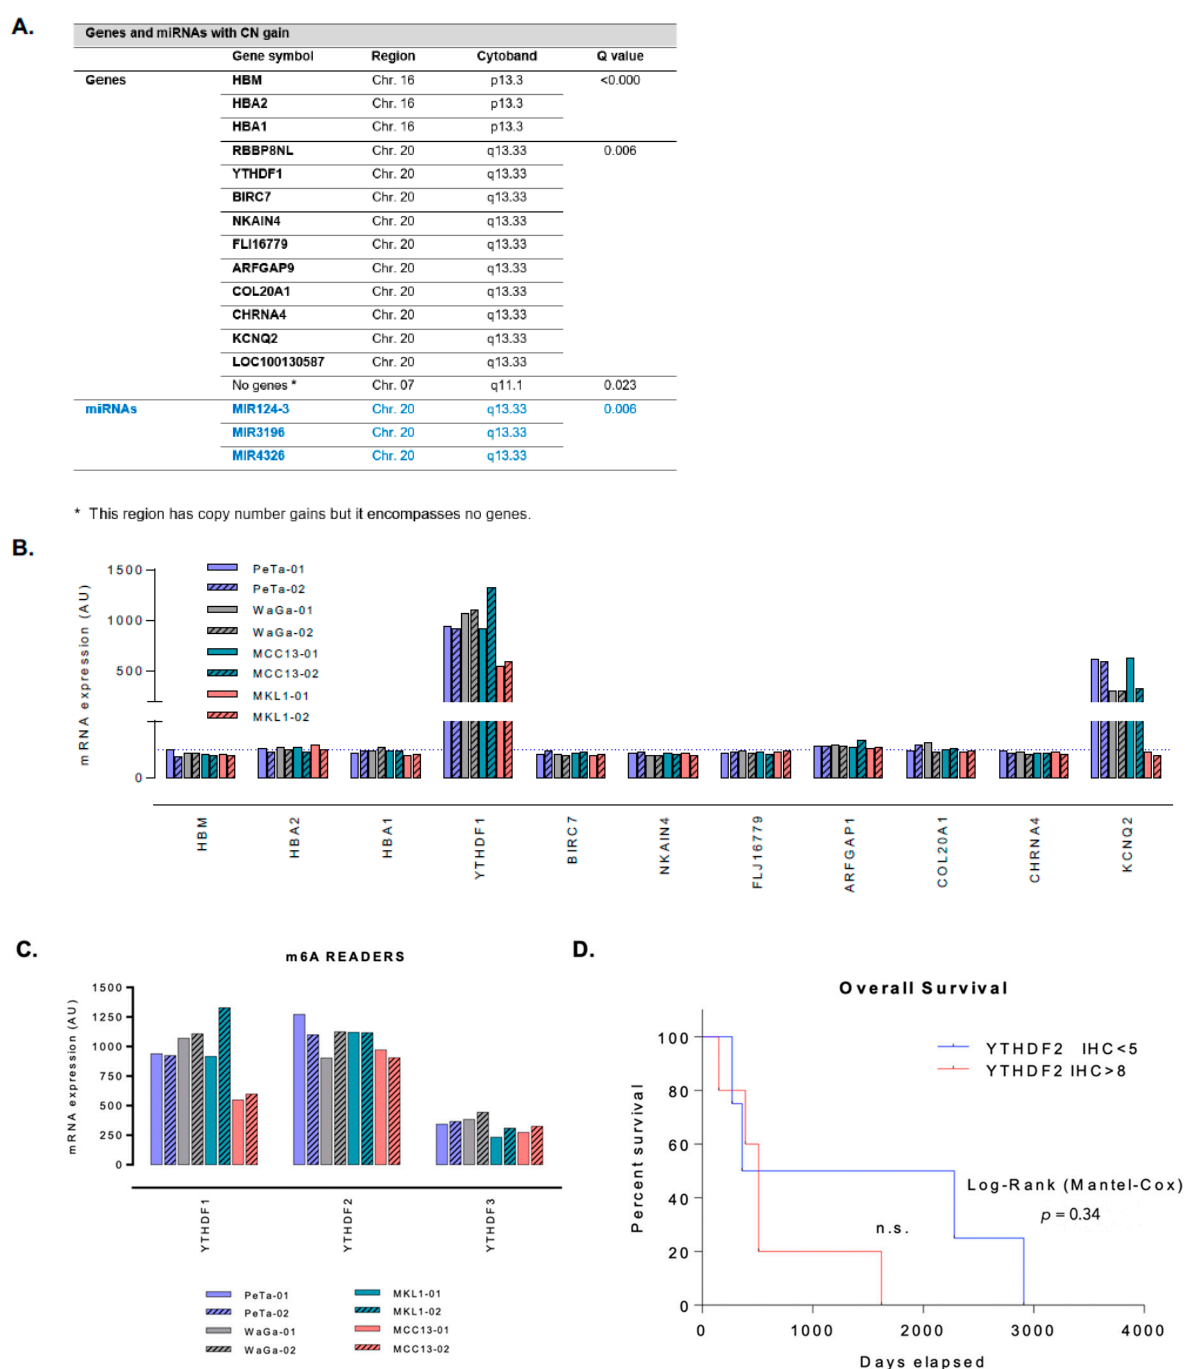

**Figure S1.** (A) Genes and miRNAs with copy number gain across all MCC cell lines (FDR < 0.05). (B) mRNA expression levels in genes with high copy number gains in MCC cell lines. Y axis has the arbitrary units (AU) of the fluorescence intensity. (C) mRNA expression in members of YTHDF gene family, YTHDF1, YTHDF2 and YTHDF3 across MCC cell lines. (D) Overall survival data in YTHDF2<sup>high</sup> (IHC > 8) versus YTHDF2<sup>low</sup> (IHC < 5) in MCC cohort (Log-Rank *p* value = 0.34).

| Site # | m <sup>6</sup> A | Position | Sequence context                                       | Score (binary) | Score (knn) | Score (spectrum) | Score (combined) | Probability |
|--------|------------------|----------|--------------------------------------------------------|----------------|-------------|------------------|------------------|-------------|
| 1      | 1                | 410      | AAUAAUCCACAAGCUC<br>AGAAGUGACUUCUCU<br>AUGUUUGAUGAGGUC | 0.555          | 0.644       | 0.688            | 0.604            | High        |
|        | 2                | 463      | AUUUCCUUGGGAAGA<br>AUUUGGAACUUAUA<br>GGAUUAUAUGCAAAG   | 0.658          | 0.476       | 0.370            | 0.533            | Low         |
| 2      | 3                | 885      | UGACGAGGCCCCUUAU<br>AUUUGGACACUAA<br>AUUCAAGAAUGGUG    | 0.530          | 0.384       | 0.605            | 0.553            | Low         |
|        | 4                | 966      | AUAUUGGCCCAUCC<br>ACACGGGACCAACUC<br>AAGAUCAGAAAGCC    | 0.559          | 0.727       | 0.660            | 0.608            | High        |
| 3      | 5                | 1090     | UUCUCAGCGUCCAG<br>GCUUCAGACUCCAG<br>UCCAGAGGACCCGAU    | 0.493          | 0.542       | 0.633            | 0.551            | Low         |
|        | 6                | 1106     | CUUCAGACUCCAGU<br>CCAGAGGCCCGAUA<br>UACCUCCGACACCC     | 0.514          | 0.536       | 0.643            | 0.567            | Moderate    |
| 4      | 7                | 2023     | AUUAUCUUGCCCAU<br>UAUCUAGACUUGCA<br>AAACCAUUCUUGC      | 0.611          | 0.575       | 0.520            | 0.573            | Moderate    |
|        | 8                | 2211     | AGAGAUCCUGGAAU<br>GACCAGGACAGAAU<br>GCUAUGUAAGAGU      | 0.645          | 0.652       | 0.478            | 0.579            | Moderate    |
| 5      | 9                | 2920     | UGCUCACAAGAGAA<br>AUUAAAAACUGGAAG<br>CAAAUUUACAGAGU    | 0.532          | 0.338       | 0.710            | 0.593            | Moderate    |
|        | 10               | 2998     | GAAAAUGUAGAGCU<br>GGUCAGGACCCUCUG<br>CUCAAUAUUCUUAU    | 0.528          | 0.632       | 0.555            | 0.544            | Low         |
| 6      | 11               | 3631     | CACUCCAUUCUUAUC<br>UAAAAGGACAGUAGU<br>UAGAGUAUUAUAAA   | 0.685          | 0.635       | 0.391            | 0.565            | Moderate    |
|        | 12               | 3982     | AAUACCAGCACCUA<br>AUCAUGAACUCUUU<br>CAUGUCCCAAUAUG     | 0.720          | 0.745       | 0.348            | 0.572            | Moderate    |
| 8      | 13               | 4920     | GCCACUAAUAGAGAA<br>UUUGAAAACUGUUA<br>GCUGUGAACCAAGU    | 0.535          | 0.503       | 0.583            | 0.553            | Low         |

**Figure S2.** This table shows the output of SRAMP algorithm performed on MCV sequence of WaGa cell lines to predict m<sup>6</sup>A sites. Position of each of the m<sup>6</sup>A sites in MCV genome as well as binary, KNN (K-nearest neighbors), spectrum and combined score are shown.

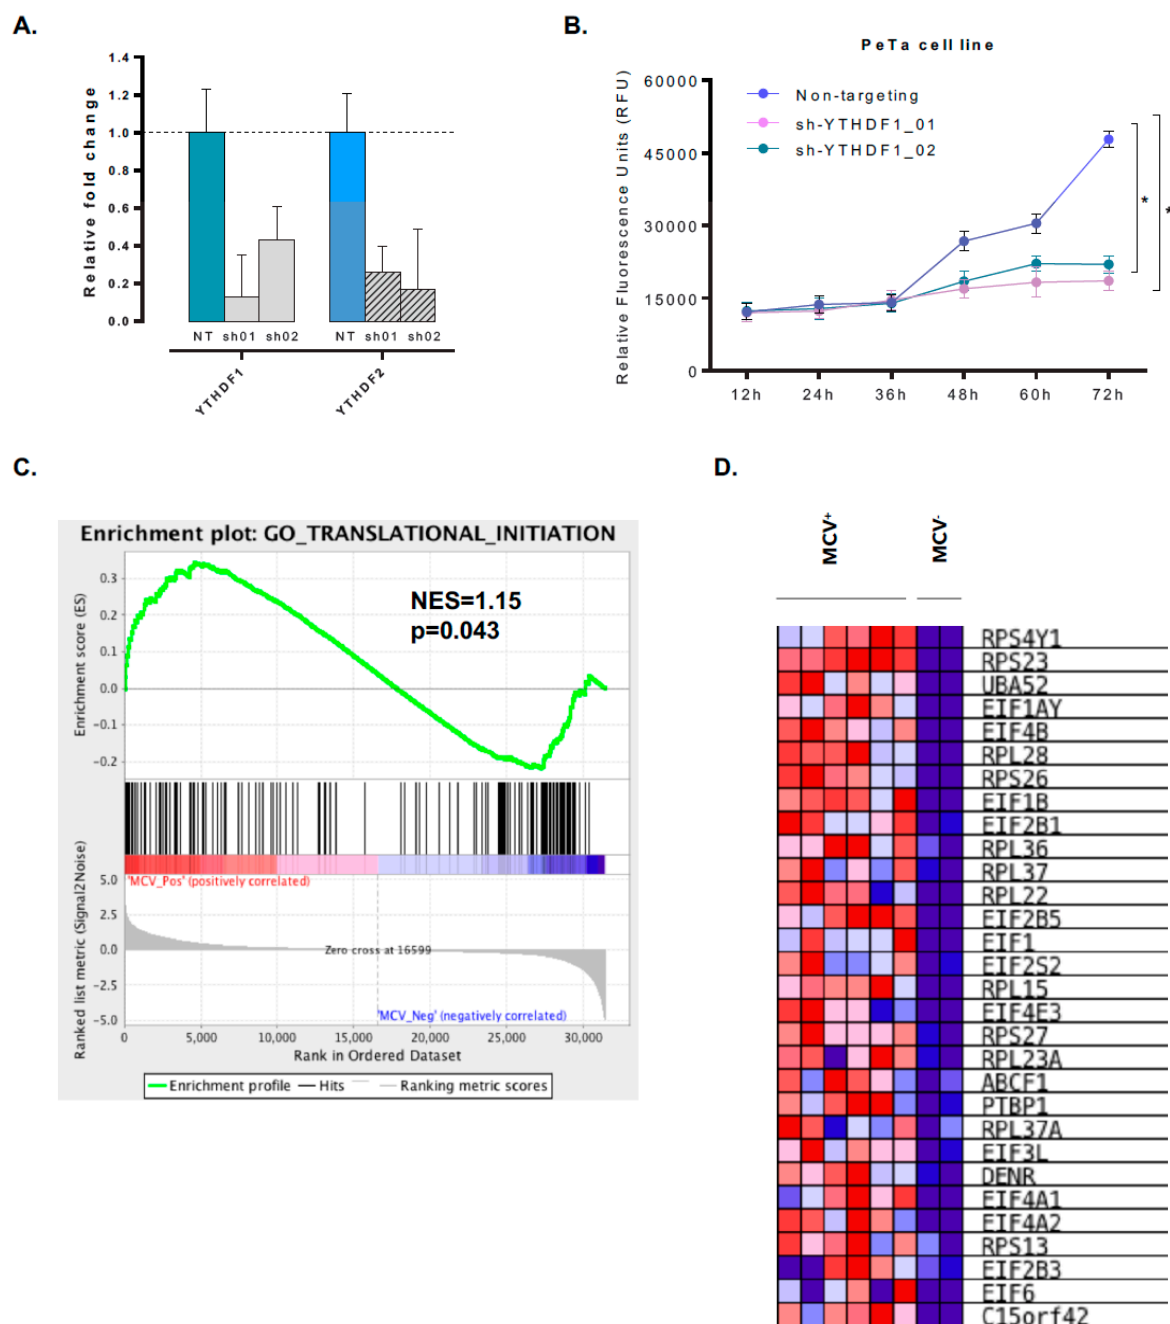

**Figure S3.** (A) qPCR indicating knock down efficiency in PeTa cell line. Non-targeting shRNA is used as control. (B) Cell proliferation rate is reduced upon YTHDF1 knockdown in PeTa cells. Asterisks indicates  $p < 0.05$ . (C) GSEA plot shows enrichment of GO term: Translational\_Initiation in MCV<sup>positive</sup> cells versus MCV<sup>negative</sup> cells (NES = 1.15,  $p = 0.043$ ). (D) Heatmap shows gene set of translation initiation factors and their expression in MCV<sup>positive</sup> and MCV<sup>negative</sup> MCC samples.

Figure 1G

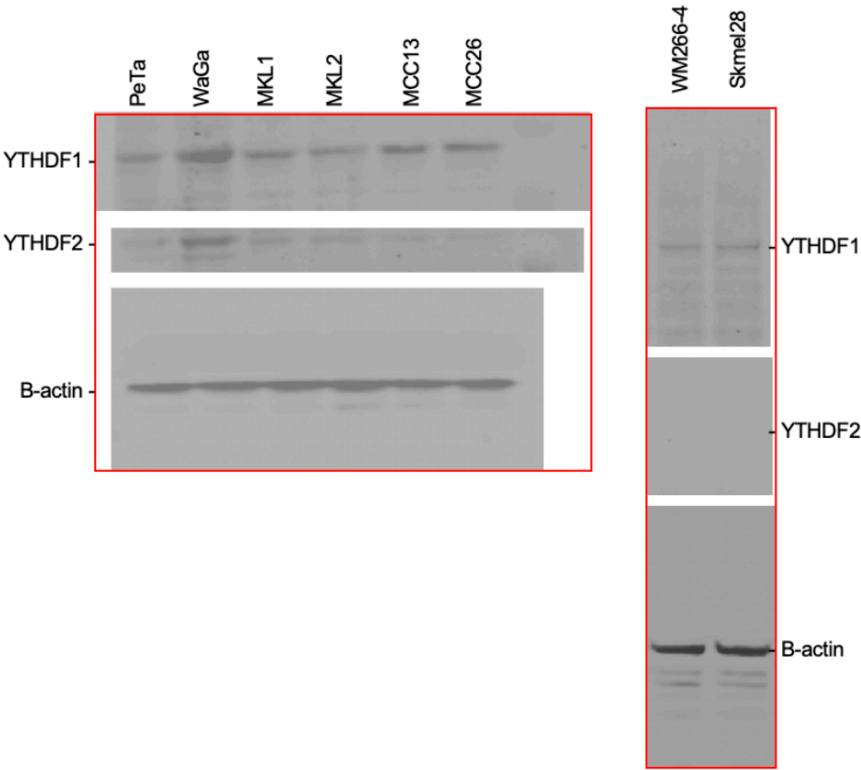

Figure 4B

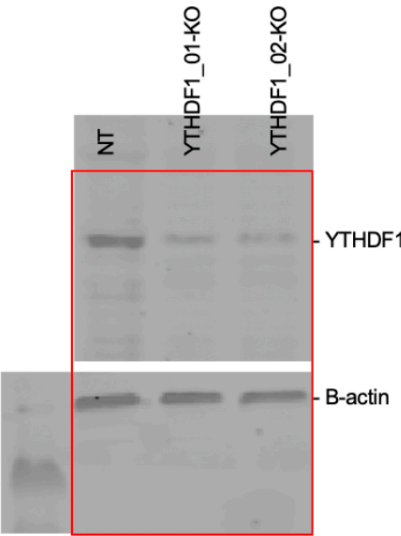

Figure 4D

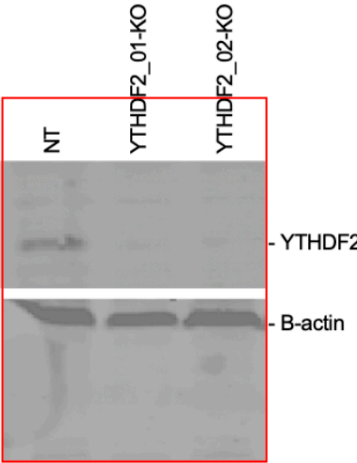

Figure S4. Whole blot for Figure 1 and Figure 4.

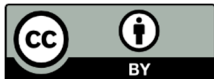

Supplement: s1 [file s1]
